# Supplementary material for: Outcomes of Different Quality of Life Assessment Modalities After Breast Cancer Therapy: A Network Meta-analysis
Source: PubMed Central journal article supplement (PMC10245190; doi:10.1001/jamanetworkopen.2023.16878), 2023-06-06
Supplement: jamanetwopen-e2316878-s001.pdf [file jamanetwopen-e2316878-s001.pdf]

## Supplementary Online Content

Kastora SL, Holmquist A, Valachis A, et al. Outcomes of different quality of life assessment modalities after breast cancer therapy: a network meta-analysis. *JAMA Netw Open*. 2023;6(6):e2316878. doi:10.1001/jamanetworkopen.2023.16878

**eFigure 1.** Likert Groupings *Excellent* vs All Other Responses (A-D) and *Excellent* and *Very Good* vs All Other Responses (E-H), Bayesian Analysis

**eFigure 2.** Node-Splitting Model of *Excellent* vs All Other Responses (Figure 3A) and *Excellent* and *Very Good* vs All Other Responses (Figure 3B)

**eFigure 3.** Expert Panel Responses to Ranking Questions, From Most to Least Important, Questions 7 to 10

**eFigure 4.** Expert Panel Responses to Ranking Questions, From Most to Least Important, Questions 11 to 14

**eTable 1.** Likert Reporting per Original Publication and Normalized Categories to Facilitate Cumulative Data Analysis

**eTable 2.** PICO Chart of Included Studies

**eTable 3.** Aggregate Patient Data Regarding Medical and Surgical BC Management

**eTable 4.** Aggregate Patient Data Regarding Tumor Characteristics

**eTable 5.** AO Modality Network Ratio of ORs and Incoherence Statistical Significance of Comparison per Outcome

**eTable 6.** Node-Splitting Model of *Excellent* vs All Other Responses (Figure 3A) and *Excellent* and *Very Good* vs All Other Responses (Figure 3B), Supplementary to Figure 2

**eTable 7.** Newcastle-Ottawa Scale and GRADE Rating per Study

**eTable 8.** CiNEMa NMA Ratings

**eAppendix.** Expert Panel Questionnaire

**eReferences**

This supplemental material has been provided by the authors to give readers additional information about their work.

**eFigure 1.** Likert Groupings *Excellent* vs All Other Responses (A-D) and *Excellent* and *Very Good* vs All Other Responses (E-H), Bayesian Analysis

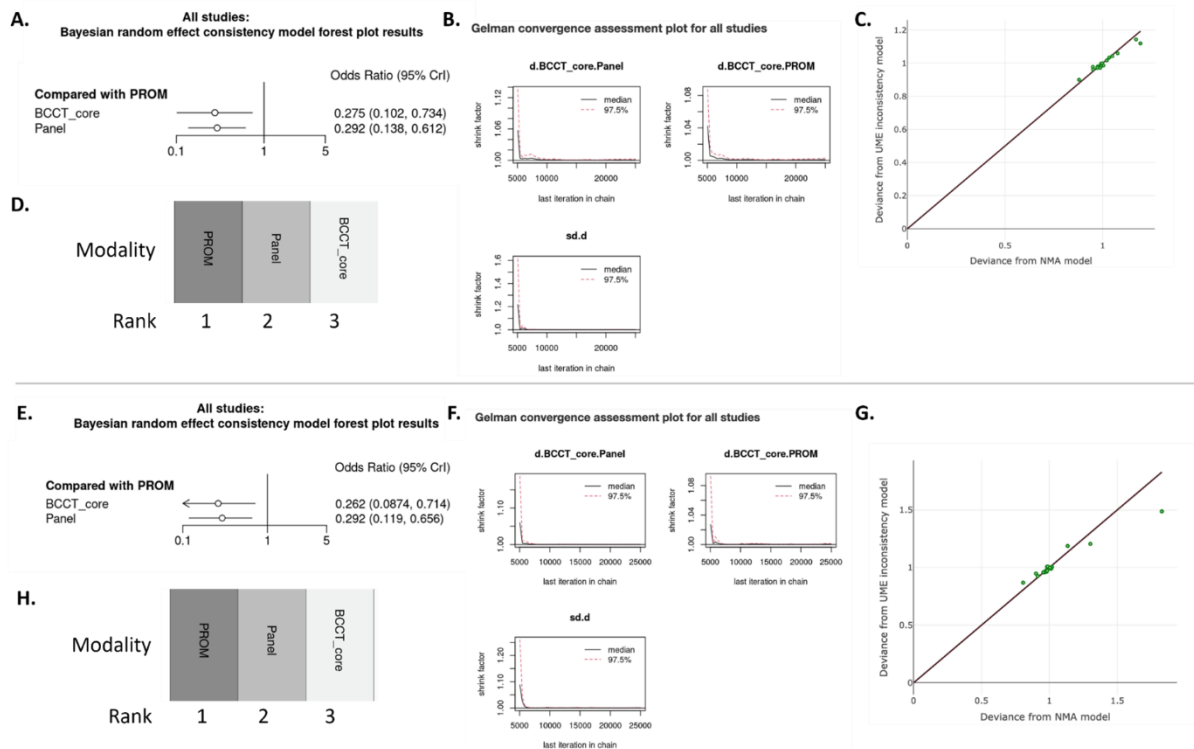

Forest plots where PROM used as reference (A, E), Gelman network convergence (B, F), network deviance plot (C, G) and Ranking analysis (D, H), are also provided. Plots generated with MetaInsight R Package.

**eFigure 2.** Node-Splitting Model of *Excellent* vs All Other Responses (Figure 3A) and *Excellent* and *Very Good* vs All Other Responses (Figure 3B)

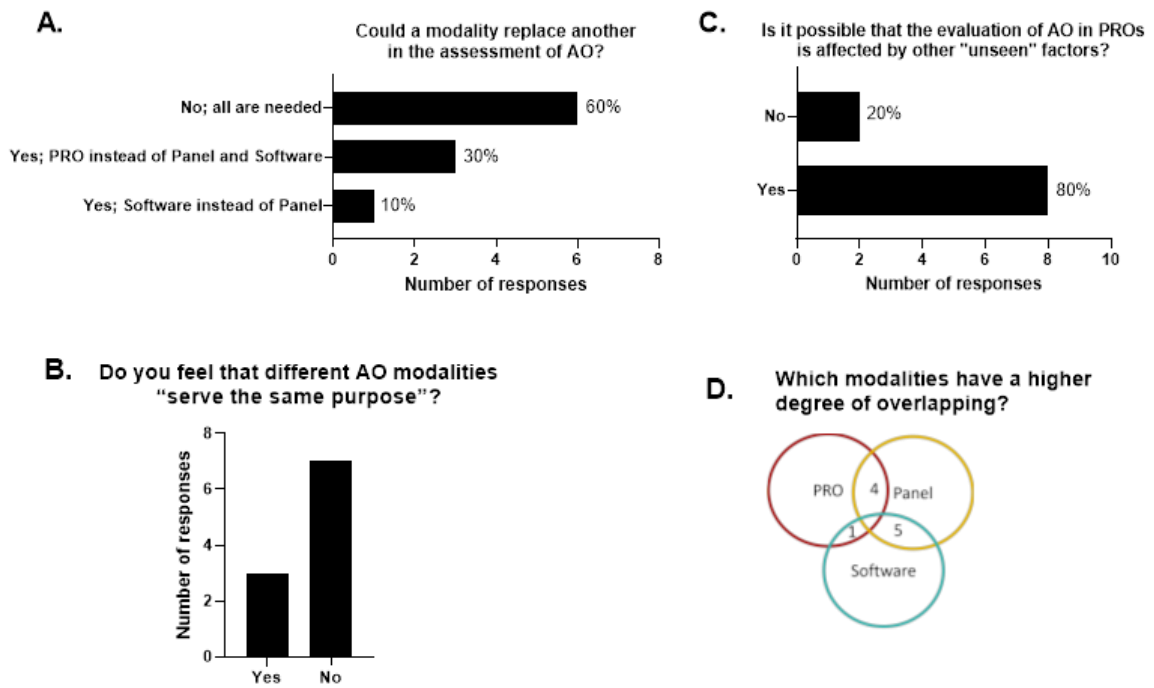

**eFigure 3.** Expert Panel Responses to Ranking Questions, From Most to Least Important, Questions 7 to 10

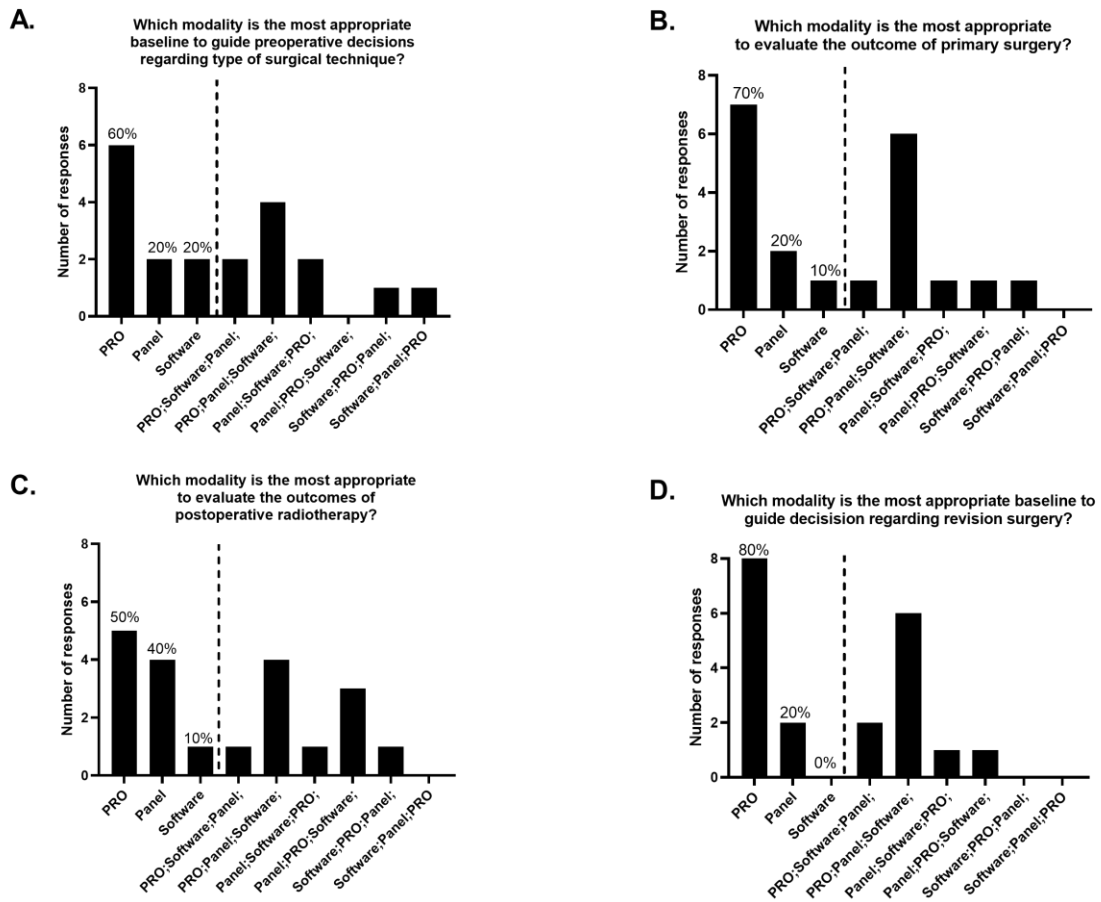

**eFigure 4.** Expert Panel Responses to Ranking Questions, From Most to Least Important, Questions 11 to 14

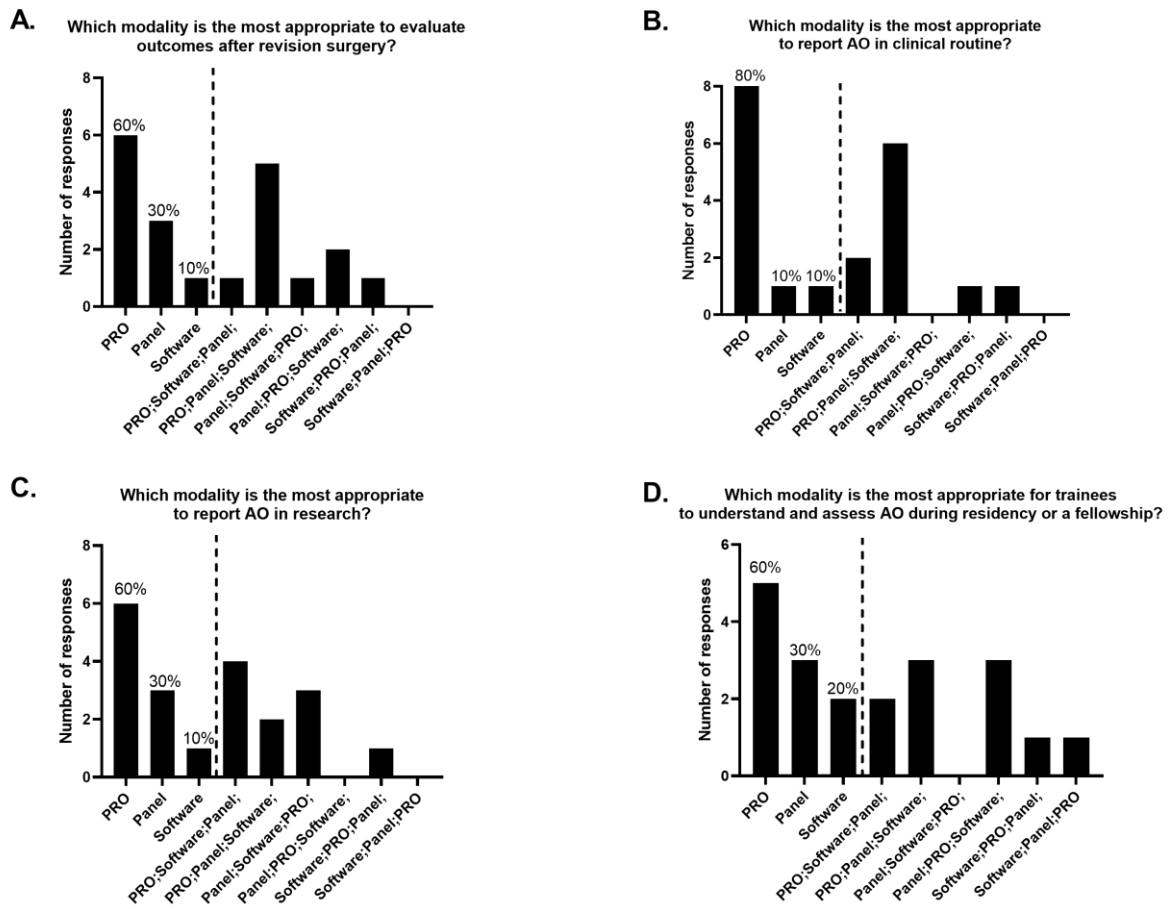

**eTable 1.** Likert Reporting per Original Publication and Normalized Categories to Facilitate Cumulative Data Analysis

| A/a                                  | 4-Point Likert scale | 5-Point Likert scale | 5-Point Likert scale normalisation in 4 categories employed in network meta-analysis                                                                                                                                                                                                                                                                                                                                                                   |
|--------------------------------------|----------------------|----------------------|--------------------------------------------------------------------------------------------------------------------------------------------------------------------------------------------------------------------------------------------------------------------------------------------------------------------------------------------------------------------------------------------------------------------------------------------------------|
| Brunault et al., <sup>[1]</sup> 2013 |                      | ✓                    | Likert Response “Excellent” includes “Excellent” category of original publication.<br>Likert response “Very good” includes “Good” category of original publication.<br>Likert response “Satisfactory” includes “Satisfying” category of original publication.<br>Likert response “Bad” includes “Bad” and Very Bad” categories of original publication.                                                                                                |
| Dahlbäck et al., <sup>[2]</sup> 2018 | ✓                    |                      |                                                                                                                                                                                                                                                                                                                                                                                                                                                        |
| Haloua et al., <sup>[3]</sup> 2014   | ✓                    |                      |                                                                                                                                                                                                                                                                                                                                                                                                                                                        |
| Hennigs et al., <sup>[4]</sup> 2016  | ✓                    |                      |                                                                                                                                                                                                                                                                                                                                                                                                                                                        |
| Kim et al., <sup>[5]</sup> 2015      | ✓                    |                      |                                                                                                                                                                                                                                                                                                                                                                                                                                                        |
| Waljee et al., <sup>[6]</sup> 2008   | ✓                    |                      |                                                                                                                                                                                                                                                                                                                                                                                                                                                        |
| Sneeuw et al., <sup>[7]</sup> 1992   | ✓                    |                      |                                                                                                                                                                                                                                                                                                                                                                                                                                                        |
| Santos et al., <sup>[8]</sup> 2015   |                      | ✓                    | Likert Response “Excellent” includes “Very Good” category of original publication.<br>Likert response “Very good” includes “Good” category of original publication.<br>Likert response “Satisfactory” includes “Moderate” and “Fair” categories of original publication.<br>Likert response “Bad” includes “Poor” category of original publication.                                                                                                    |
| Wu et al., <sup>[9]</sup> 2022       | ✓                    |                      |                                                                                                                                                                                                                                                                                                                                                                                                                                                        |
| Zwakman et al., <sup>[10]</sup> 2022 |                      | ✓                    | Likert Response “Excellent” includes “5” (PRO) or “>75-100%” (BCCT.core) category of original publication.<br>Likert response “Very good” includes “4” (PRO) or “>50-75%” (BCCT.core) category of original publication.<br>Likert response “Satisfactory” includes “2 and 3” (PRO) or “>25-50%” (BCCT.core) categories of original publication.<br>Likert response “Bad” includes “1” (PRO) or “0-25%” (BCCT.core) categories of original publication. |

**eTable 2.** PICO Chart of Included Studies

| A/a                                  | Country | Sample size | Operation (Mx_R, BCT) | Follow-up (Median ± SD or range <sup>c</sup> ) in months | Comparison                                             | Breast cosmesis assessment method /instrument                                   | Type of effect size                                          | AO [type of effect size, numeric value, SE and in-study p-value]; upk/wk                                     | Panel characteristics                                                                                                |
|--------------------------------------|---------|-------------|-----------------------|----------------------------------------------------------|--------------------------------------------------------|---------------------------------------------------------------------------------|--------------------------------------------------------------|--------------------------------------------------------------------------------------------------------------|----------------------------------------------------------------------------------------------------------------------|
| Brunault et al., <sup>[1]</sup> 2013 | France  | 120         | BCT                   | 80.4 [73.2-132] <sup>c</sup>                             | Hoeller Qs (Patients) vs. Fehlauer (Doctors)           | Hoeller et al. Qs <sup>d</sup> _Patients; Fehlauer et al. <sup>d</sup> _Doctors | Cronbach's alpha; Factors influencing outcome Cox regression | Panel vs. PRO 1.7 (95% CI 1.02-2.86; P=0.03)<br>Internal consistency a = 0.58, no P value provided           | Number and panel member specialty not stated                                                                         |
| Dahlbäck et al., <sup>[2]</sup> 2018 | Sweden  | 532         | BCT                   | 16 [11 – 23] <sup>c</sup>                                | BCCT.core (N=310) vs Panel (N=215) vs Breast Q (N=348) | Panel <sup>e</sup> ; Breast-Q <sup>e</sup> ; BCCT.core <sup>e</sup>             | Weighted k                                                   | Breast Q vs. BCCT.core: 0.65 (Cut off: 66) P= 0.003.<br>Panel vs. BCCT.core_wk 0.46 [0.43 to 0.60]; P<0.0001 | 3-member panel (nurse Plastic and Reconstructive Surgery, nurse Breast Surgery, doctor_ general and plastic surgery) |

|                                                  |                 |                  |                            |                             |                                 |                                                                    |                                                                                    |                                                                                                                                                                                 |                                                                                                                                                  |
|--------------------------------------------------|-----------------|------------------|----------------------------|-----------------------------|---------------------------------|--------------------------------------------------------------------|------------------------------------------------------------------------------------|---------------------------------------------------------------------------------------------------------------------------------------------------------------------------------|--------------------------------------------------------------------------------------------------------------------------------------------------|
| Halo<br>ua et<br>al., <sup>[3]</sup><br>2014     | Netherla<br>nds | 109              | BCT                        | 20 [12–40] <sup>c</sup>     | BCCT.core<br>vs. Panel<br>score | Panel <sup>e</sup> ;<br>BCCT.core <sup>e</sup>                     | Weighted k                                                                         | Panel vs. BCCT.core<br>OR 1.44 (95% CI 0.84-<br>2.47; P=0.17) Panel<br>vs. BCCT.core_ wk<br>0.68 (95% CI 0.57-<br>0.77); no P value<br>provided                                 | 10- member panel; two<br>breast surgeons, two<br>surgical residents, two<br>laypersons, and four<br>experienced plastic<br>surgeons <sup>f</sup> |
| Hen<br>nigs<br>et<br>al., <sup>[4]</sup><br>2016 | Germany         | 621              | BCT                        | [24-72] <sup>c</sup>        | No<br>comparison                | BCTOS <sup>e</sup>                                                 | Chi square;<br>Factors<br>influencing<br>outcome_log<br>regression (OR,<br>95% CI) | OR: 2.48; 95% CI: 1.4-<br>12.48); P= 0.008                                                                                                                                      | N/A                                                                                                                                              |
| Kim<br>et<br>al., <sup>[5]</sup><br>2015         | Korea           | 617 <sup>a</sup> | BCT N=485<br>Mx_R<br>N=46, | 25.2 [No range<br>provided] | BCCT.core<br>vs. Panel          | BCCT.core <sup>e</sup><br>EORTC QLQ-<br>C30 and the<br>BR23 module | Weighted k;<br>Factors<br>influencing<br>outcome_log<br>regression (OR,<br>95% CI) | OR (BCCT.core) 5.13;<br>95% CI 0.04-10.221;<br>P=0.048.<br>OR (Panel) 3.09; 95%<br>CI 1.19-7.38;<br>P=0.015,<br>Panel vs. BCCT.core_<br>wk 0.35 [95% CI<br>0.25-0.5; P <0.0001] | 4- member panel;<br>physicians <sup>g</sup>                                                                                                      |



|                                    |        |                  |                     |                          |                     |                                                                             |                                                         |                                                                                                                                                                                                                                           |                                                          |
|------------------------------------|--------|------------------|---------------------|--------------------------|---------------------|-----------------------------------------------------------------------------|---------------------------------------------------------|-------------------------------------------------------------------------------------------------------------------------------------------------------------------------------------------------------------------------------------------|----------------------------------------------------------|
| Waljee et al., <sup>[6]</sup> 2008 | USA    | 635 <sup>b</sup> | BCT                 | 30 [<12-48] <sup>c</sup> | No comparison       | BCTOS <sup>e</sup>                                                          | Factors influencing outcome_log regression (OR, 95% CI) | OR 1.53 (95% CI 0.92-2.56; P= 0.002)                                                                                                                                                                                                      | N/A                                                      |
| Sneeuw et al., <sup>[7]</sup> 1992 | UK     | 76               | BCT                 | 48 [24-132]              | PRO vs Panel        | Panel <sup>e</sup> vs Patient Qs (Qs as per the present study) <sup>e</sup> | Cohens' k                                               | Patient vs Panel OR 5.54 (95% CI 2.33-13.16; P<0.0001)<br>Panel vs. Patient_Cohens' k 0.08 (0.07-0.09); no P value                                                                                                                        | 2-member panel; oncology nurse, radiation oncologist     |
| Santos et al., <sup>[8]</sup> 2015 | Brazil | 122              | BCT N=65; Mx_R N=57 | 38.8 [16.4-57.1]         | BCCT.core vs. Panel | BCCT.core <sup>e</sup> ; Garbay scale <sup>e</sup>                          | Weighted k                                              | Patient vs Panel OR 1 (95% CI 0.27-3.66; P=1)<br>Patient vs. BCCT.core OR 3.027 (95% CI 1.01-9.29; P=0.04)<br>Panel vs BCCT.core k = 0.12 (Low).<br>Panel vs. Patient_wk not provided.<br>BCCT.core vs. Patient_wk not provided, P<0.001. | 4-member panel; 2 breast surgeons and 2 plastic surgeons |

|                                      |             |     |     |            |                              |                                                                                                    |            |                                                                                                     |                                                                                                                                                           |
|--------------------------------------|-------------|-----|-----|------------|------------------------------|----------------------------------------------------------------------------------------------------|------------|-----------------------------------------------------------------------------------------------------|-----------------------------------------------------------------------------------------------------------------------------------------------------------|
| Wu et al., <sup>[9]</sup> 2022       | USA         | 147 | BCT | Not stated | BCCT.core vs. Panel          | BCCT.core <sup>d</sup> ; Vibras scale (0-100%) <sup>d</sup>                                        | Pearson R  | No OR [95% CI] provided                                                                             | 6-member panel; 2 plastic surgeons, 1 plastics resident, 3 medical school students                                                                        |
| Zwakman et al., <sup>[10]</sup> 2022 | Netherlands | 104 | BCT | 78 [72-96] | BCCT.core vs. Panel vs. PROM | BCCT.core <sup>e</sup> ; Panel Delgado et al visual scale <sup>e</sup> ; Patients (EORTC QLQ-BR23) | Spearman R | Panel vs BCCT.core R: 0.558, P < 0.001<br>Patients ('body image') vs. BCCT.core R: 0.110, P = 0.267 | 14-member panel; 3 oncologic surgeons, 3 plastic surgeons, 3 surgery residents and 3 plastic surgery residents and two breast oncology specialized nurses |

Mx+ Recon: Mastectomy and Reconstruction; BCT: Breast Conserving Therapy; N/A: Non-applicable, Agreement at follow: upk=kappa; wk: weighted kappa  
<sup>a</sup> 87 patients underwent mastectomy, <sup>b</sup>79 patients required further Mastectomy. <sup>c</sup> Marked values indicate range, <sup>d</sup>Measured in 5-point Likert scale, <sup>e</sup> Measured in 4-point Likert scale, <sup>f</sup> at least 10 years of experience with breast reconstruction surgery <sup>g</sup>Specialty not stated

**eTable 3.** Aggregate Patient Data Regarding Medical and Surgical BC Management

| Variable                                   | Studies reporting | Percentage of population (%) | Crude Number of patients with reported variable | Total number of patients in studies reporting the given variable |  |
|--------------------------------------------|-------------------|------------------------------|-------------------------------------------------|------------------------------------------------------------------|--|
| Chemotherapy                               | 7 out of 10       | 46.7                         | 1024                                            | 2217                                                             |  |
| Hormonal Therapy                           | 4 out of 10       | 59.2                         | 813                                             | 1373                                                             |  |
| Radiation therapy                          | 7 out of 10       | 85.8                         | 1917                                            | 2235                                                             |  |
| Wide local excision or oncoplastic surgery | 10 out of 10      | 91.4                         | 2818                                            | 3083                                                             |  |
| Mastectomy                                 | 10 out of 10      | 2.8                          | 86                                              | 3083                                                             |  |
| Axillary node clearance                    | 6 out of 10       | 6.6                          | 95                                              | 1440                                                             |  |

Of the included studies, seven reported whether patients had received chemotherapy, 46.7% [ $N_{\text{received chemotherapy}}/N_{\text{reported chemotherapy}}=1024/2217$ ]. [1-2, 4-5, 7, 9-10] Whether patients had received hormonal therapy was reported in four studies 59.2% [ $N_{\text{received HT}}/N_{\text{reported HT status}} = 813/1373$ ]. [1-2, 5, 10,] Seven studies reported whether patients underwent radiation therapy post-surgical management, 85.8% [ $N_{\text{received RT}}/N_{\text{reported RT status}} = 1917/2235$ ]. [1-2, 4, 5, 8-10]

**eTable 4.** Aggregate Patient Data Regarding Tumor Characteristics

| Tumour characteristics |                   |                  |                         |                      |                           |
|------------------------|-------------------|------------------|-------------------------|----------------------|---------------------------|
| Variable               | Studies reporting | Mean (cm)        | Standard Deviation (cm) |                      |                           |
| Tumour size            | 3 out of 10       | 1.6              | 0.15                    |                      |                           |
| Variable               | Studies reporting | Tis (%; N/Total) | Stage 1 (%; N/Total)    | Stage 2 (%; N/Total) | Stage 3 or 4 (%; N/Total) |
| Stage                  | 4 out of 10       | 17.3; 330/1904   | 35.8; 681/1904          | 24.9; 474/1904       | 2.8; 53/1904              |
| Variable               | Studies reporting | Ductal           | Lobular                 | Other                |                           |
| Histology              | 4 out of 10       | 65.4; 357/546    | 13.2; 72/546            | 21.4; 117/546        |                           |

Tumour size was reported in three studies, mean (cm): 1.6 cm (SD: 0.15). [2-3, 8] Histological categorisation of malignancy was reported for 546 patients, where 65.4% (N=357) were diagnosed with Ductal, 13.2% (N=72) with lobular and 21.4% (N=117) with another histological type. Cancer staging was reported in 4 studies with the majority of patients been diagnosed with Stage 1 cancer, 35.8% (N<sub>Stage 1</sub>/N<sub>reported Staging</sub> =681/1904), 17.3% with carcinoma in situ (Tis) (N<sub>Tis</sub>/N<sub>reported Staging</sub> =330/1904), 24.9% T2 (N<sub>Stage 2</sub>/N<sub>reported Staging</sub> =474/1904), 2.73% T3 (N<sub>Stage 3</sub>/N<sub>reported Staging</sub> =52/1904), and 0.05% T4 (N<sub>Stage 4</sub>/N<sub>reported Staging</sub> =1/1904). [1-2, 5-6] Regarding surgical management, approach was reported across all studies with 91.4 % (N=2818) undergoing breast conserving treatment (wide local excision or oncoplastic surgery) and 2.8% (N=86) undergoing mastectomy. Axillary node clearance was undertaken in 95 patients (6.6%) albeit lymph node management was only reported in six studies (N<sub>ANC</sub>/N<sub>reported axillary operation</sub> =95/1440). [2-4, 7, 8, 10]

**eTable 5.** AO Modality Network Ratio of ORs and Incoherence Statistical Significance of Comparison per Outcome

| Comparator          | “Excellent” vs. all other responses                | “Excellent” and “very good” vs. all other responses |
|---------------------|----------------------------------------------------|-----------------------------------------------------|
| Network Incoherence | $\chi^2$ 0.35, 2 degrees of freedom, P value: 0.83 | $\chi^2$ 0.34, 2 degrees of freedom, P value: 0.84  |
| Panel vs. PRO       | 0.30 [95% CI 0.17 to 0.53]; $I^2$ : 86%            | 0.32 [95% CI 0.18 to 0.59]; $I^2$ : 71%             |
| BCCT.core vs. PRO   | 0.28 [95% CI 0.13 to 0.59]; $I^2$ : 95%            | 0.61 [95% CI 0.13 to 2.78]; $I^2$ : 48%             |
| BCCT.core vs. Panel | 0.93 [95% CI 0.46 to 1.88]; $I^2$ : 88%            | 0.91 [95% CI 0.50 to 1.65]; $I^2$ : 73%             |

**eTable 6.** Node-Splitting Model of *Excellent* vs All Other Responses (Figure 3A) and *Excellent* and *Very Good* vs All Other Responses (Figure 3B), Supplementary to Figure 2

| <b>Design-by-treatment interaction model</b> |        |          |         |  |                                                        |        |          |         |  |
|----------------------------------------------|--------|----------|---------|--|--------------------------------------------------------|--------|----------|---------|--|
| Outcome                                      | Q      | df(Q)    | p-value |  |                                                        |        |          |         |  |
| Excellent vs. All other                      | 10.693 | 2        | 0.0048  |  |                                                        |        |          |         |  |
| Excellent and Very Good vs.                  | 11.984 | 2        | 0.0025  |  |                                                        |        |          |         |  |
| <b>Node splitting model</b>                  |        |          |         |  |                                                        |        |          |         |  |
| Comparison<br>Excellent vs.<br>All other     | direct | indirect | p-value |  | Comparison<br>Excellent and Very<br>Good vs. All other | direct | indirect | p-value |  |
| Panel vs PROM                                | 0.3084 | 0.1069   | 0.5168  |  | Panel vs PROM                                          | 0.3717 | 0.8626   | 0.6087  |  |
| BCCT.core vs PROM                            | 0.2547 | 0.3696   | 0.6732  |  | BCCT.core vs PROM                                      | 0.2528 | 0.4204   | 0.5017  |  |
| BCCT.core vs Panel                           | 0.9379 | 0.9319   | 0.9957  |  | BCCT.core vs Panel                                     | 0.8449 | 0.4436   | 0.5559  |  |

**eTable 7.** Newcastle-Ottawa Scale and GRADE Rating per Study

|                                      | Selection                                           |                                                                    |                           |                                                                          | Comparability                                                                       | Outcome               |                                                 |                                  | Max of 9 |                                 |              |             |               |              |                  |
|--------------------------------------|-----------------------------------------------------|--------------------------------------------------------------------|---------------------------|--------------------------------------------------------------------------|-------------------------------------------------------------------------------------|-----------------------|-------------------------------------------------|----------------------------------|----------|---------------------------------|--------------|-------------|---------------|--------------|------------------|
|                                      | NOS scale                                           |                                                                    |                           |                                                                          |                                                                                     |                       |                                                 |                                  |          | GRADE ratings                   |              |             |               |              |                  |
| Study                                | Representativeness of the exposed cohort (Patients) | Selection of the non-exposed cohort (Other means of AO assessment) | Ascertainment of exposure | Demonstration that outcome of interest was not present at start of study | Comparability of cohorts based on the design or analysis controlled for confounders | Assessment of outcome | Was follow-up long enough for outcomes to occur | Adequacy of follow-up of cohorts |          | Notes                           | Risk of Bias | Imprecision | Inconsistency | Indirectness | Publication bias |
| Brunault et al., <sup>[1]</sup> 2013 | 1                                                   | 1                                                                  | 1                         | 1                                                                        | 2                                                                                   | 1                     | 1                                               | 1                                | 9        | Nil deducted                    | Moderate     | Moderate    | High          | High         | High             |
| Dahlbäck et al., <sup>[2]</sup> 2018 | 1                                                   | 1                                                                  | 1                         | 1                                                                        | 2                                                                                   | 1                     | 1                                               | 1                                | 9        | Nil deducted                    | Moderate     | High        | Moderate      | Moderate     | High             |
| Haloua et al., <sup>[3]</sup> 2014   | 0                                                   | 1                                                                  | 1                         | 1                                                                        | 2                                                                                   | 1                     | 1                                               | 1                                | 8        | 1 point off- no patient scoring | Moderate     | Very low    | Moderate      | High         | High             |

|                                     |   |   |   |   |   |   |   |   |   |                                                |          |          |          |          |      |
|-------------------------------------|---|---|---|---|---|---|---|---|---|------------------------------------------------|----------|----------|----------|----------|------|
| Hennigs et al., <sup>[4]</sup> 2016 | 0 | 1 | 1 | 1 | 0 | 1 | 1 | 1 | 6 | 2 points off-no comparison, no patient scoring | Moderate | High     | Moderate | Low      | High |
| Kim et al., <sup>[5]</sup> 2015     | 0 | 1 | 1 | 1 | 2 | 1 | 1 | 1 | 8 | 1 point off- no patient scoring                | Low      | High     | Moderate | Moderate | High |
| Waljee et al., <sup>[6]</sup> 2008  | 0 | 1 | 1 | 1 | 0 | 1 | 1 | 1 | 6 | 2 points off-no comparison, no patient scoring | Moderate | Moderate | Moderate | High     | High |
| Sneeuw et al., <sup>[7]</sup> 1992  | 1 | 1 | 1 | 1 | 2 | 1 | 1 | 1 | 9 | Nil deducted                                   | Moderate | Moderate | High     | High     | High |
| Santos et al., <sup>[8]</sup> 2015  | 0 | 1 | 1 | 1 | 2 | 1 | 1 | 1 | 8 | 1 point off- no patient scoring                | Moderate | Moderate | High     | Moderate | High |
| Wu et al., <sup>[9]</sup> 2022      | 1 | 1 | 1 | 0 | 2 | 1 | 0 | 1 | 7 | No follow up stated, no raw numbers of         | Moderate | High     | High     | Moderate | High |



|                              |   |   |   |   |    |   |  |   |   |                   |          |      |      |      |      |
|------------------------------|---|---|---|---|----|---|--|---|---|-------------------|----------|------|------|------|------|
|                              |   |   |   |   |    |   |  |   |   | patient responses |          |      |      |      |      |
| Zwakman et al.,<br>[10] 2022 | 1 | 1 | * | * | ** | * |  | * | 8 |                   | Moderate | High | High | High | High |

NOS Rating interpretation: For an overall assessment of good quality 3 or 4 stars in selection domain AND 1 or 2 stars in comparability domain AND 2 or 3 stars in outcome/exposure domain need to be awarded. Equally, Fair quality, 2 stars in selection domain AND 1 or 2 stars in comparability domain AND 2 or 3 stars in outcome/exposure domain and poor quality, 0 or 1 star in selection domain OR 0 stars in comparability domain OR 0 or 1 stars in outcome/exposure domain where high confidence in evidence is expressed as high, moderate confidence, low confidence, and very low.

**eTable 8.** CiNEMa NMA Ratings

| Comparison       | Number of studies | Within-study bias | Reporting bias | Indirectness | Imprecision    | Heterogeneity  | Incoherence | Confidence rating | Reason(s) for downgrading           |
|------------------|-------------------|-------------------|----------------|--------------|----------------|----------------|-------------|-------------------|-------------------------------------|
| BCCT.core: PROM  | 3                 | No concerns       | Some concerns  | No concerns  | No concerns    | Major concerns | No concerns | High              | ["Reporting bias", "Heterogeneity"] |
| BCCT.core: Panel | 4                 | No concerns       | Some concerns  | No concerns  | Major concerns | No concerns    | No concerns | High              | ["Reporting bias", "Imprecision"]   |
| Panel: PROM      | 7                 | No concerns       | Some concerns  | No concerns  | No concerns    | Major concerns | No concerns | High              | ["Reporting bias", "Heterogeneity"] |

## **eAppendix. Expert Panel Questionnaire**

Different aesthetic assessment modalities following breast cancer therapy

Introduction & Instructions. Dear Colleagues,

Thank you for accepting to be a part of this project. You have been selected on grounds of expertise and engagement in the topic of assessment of aesthetic outcomes (AO) after locoregional breast cancer therapy.

The assessment of AO has been identified as a significant priority in clinical practice and research in recent years. Different modalities have been developed, with Patient-Reported Outcomes (PRO), external validation by a Panel and Software-based assessment being the most popular. However, these modalities are conceptually different. In order to assess the outcomes of the published literature, we conducted a systematic review and network meta-analysis of studies that compared at least two different modalities. You have already received the results in a separate file.

We now ask your contribution to interpret these results. The following questions will be part of the results and will allow us to format the discussion. For questions 2-16, please provide YOUR opinion, regardless of the findings in the meta-analysis. For items with ranking, please "drag" the alternatives from top to bottom (most important to least important). With regards to question 17, we ask for your personal thoughts on the findings of the meta-analysis. Finally, in question 18, we ask for your opinion, based on expertise and the present findings.

Required

1. Please provide your name and affiliation

2. Could a modality replace another in the assessment of AO?

Yes; PRO instead of Panel

Yes; PRO instead of Software

Yes; PRO instead of Panel and Software

Yes; Panel instead of PRO

Yes; Panel instead of Software

Yes; Panel instead of PRO and Software

Yes; Software instead of PRO

Yes; Software instead of Panel

Yes; Software instead of Panel and PRO

No; all are needed

3. Do you feel that different AO modalities "serve the same purpose"?

Yes

No

4.If you responded "No" to Question 2, please explain

5.In your opinion, which modalities have a higher degree of overlapping?

PRO and Panel

PRO and software

Panel and software

6. In your opinion, is it possible that the evaluation of AO in PROs is affected by other, "unseen" factors (postoperative pain, chest wall and upper limb morbidity, adverse effects from systemic treatment)?

Yes

No

7.In your opinion, which modality is the most appropriate baseline to guide preoperative decisions regarding type of surgical technique? (rank from most to least important)

PRO

Panel

Software

8.In your opinion, which modality is the most appropriate to evaluate the outcome of primary surgery? (rank from most to least important)

PRO

Panel

Software

9.In your opinion, which modality is the most appropriate to evaluate the outcomes of postoperative radiotherapy? (rank from most to least important)

PRO

Panel

Software

10.In your opinion, which modality is the most appropriate baseline to guide decisions regarding revision surgery? (rank from most to least important)

PRO

Panel

Software

11.In your opinion, which modality is the most appropriate to evaluate outcomes after revision surgery? (rank from most to least important)

PRO

Panel

Software

12. In your opinion, which modality is the most appropriate to report AO in clinical routine? (rank from most to least important)

PRO

Panel

Software

13. In your opinion, which modality is the most appropriate to report AO in research? (rank from most to least important)

PRO

Panel

Software

14. In your opinion, which modality is the most appropriate for trainees to understand and assess AO during residency or a fellowship? (rank from most to least important)

PRO

Panel

Software

15. If you feel that there is a need for improvement of AO reporting, please provide with the alternatives you feel suit best (more than one alternative is allowed)

PROs need to develop further and utilise a single type of questionnaire

Panel-based AO evaluation needs standardisation

Software-based standardisation needs to become "smart" (ie, integrate PRO outcomes and/or panel assessments)

16. If you had a SINGLE modality to follow AO, which one would you prefer?

PRO

Panel

Software

17. How would you, as a clinician, interpret the discordance among modalities found in the meta-analysis?

18. Please provide what you would consider as knowledge gaps and research priorities. (Free text answer)

## References

1. Brunault, P., Suzanne, I., Trzepidur-Edom, M. Depression is associated with some patient-perceived cosmetic changes, but not with radiotherapy-induced late toxicity, in long-term breast cancer survivors. *Psycho-Oncology*. 2013; 22(3), 590-597.
2. Dahlbäck C, Ringberg A, Manjer J. Aesthetic outcome following breast-conserving surgery assessed by three evaluation modalities in relation to health-related quality of life. *Journal of British Surgery*. 2019;106(1):90-9.
3. Haloua MH, Krekel NM, Jacobs GJ. Cosmetic outcome assessment following breast-conserving therapy: a comparison between BCCT. core software and panel evaluation. *International journal of breast cancer*. 2014;1;2014.
4. Hennigs A, Biehl H, Rauch G. Change of patient-reported aesthetic outcome over time and identification of factors characterizing poor aesthetic outcome after breast-conserving therapy: long-term results of a prospective cohort study. *Annals of surgical oncology*. 2016 May;23(5):1744-51.
5. Kim MK, Kim T, Moon HG.. Effect of cosmetic outcome on quality of life after breast cancer surgery. *EJSO*. 2015; 1;41(3):426-32.
6. Waljee JF, Hu ES, Ubel PA, Smith DM, Newman LA, Alderman AK. Effect of esthetic outcome after breast-conserving surgery on psychosocial functioning and quality of life. *Journal of Clinical Oncology*. 2008; 10;26(20):3331-7.
7. Sneeuw KC, Aaronson NK, Yarnold JR, Broderick M, Regan J, Ross G, Goddard A. Cosmetic and functional outcomes of breast conserving treatment for early stage breast cancer. 1. Comparison of patients' ratings, observers' ratings and objective assessments. *Radiotherapy and oncology*. 1992; 1;25(3):153-9.
8. Santos G, Urban C, Edelweiss MI. Long-term comparison of aesthetical outcomes after oncoplastic surgery and lumpectomy in breast cancer patients. *Annals of surgical oncology*. 2015; 22(8):2500-8.
9. Wu SS, Duraes EF, Scomacao I, Morisada M. Beauty Is in the Eye of the Beholder: Factors Influencing Disparity in Perceptions of Breast Reconstruction Aesthetic Outcomes. *Plastic and Reconstructive Surgery*. 2022 May 2:10-97
10. Zwakman M, Tan A, Boersma C. Long-term quality of life and aesthetic outcomes after breast conserving surgery in patients with breast cancer. *European Journal of Surgical Oncology*. 2022 Feb 12.
