# Supplementary material for: Outcomes of Different Quality of Life Assessment Modalities After Breast Cancer Therapy: A Network Meta-analysis
Source: PubMed Central journal article supplement (PMC10245190; doi:10.1001/jamanetworkopen.2023.16878), 2023-06-06
Supplement: jamanetwopen-e2316878-s002.pdf [file jamanetwopen-e2316878-s002.pdf]

## Data Sharing Statement

Kastora. Outcomes of Different Quality of Life Assessment Modalities After Breast Cancer Therapy. *JAMA Netw Open*. Published June 06, 2023.

doi:10.1001/jamanetworkopen.2023.16878

### Data

**Data available:** Yes

**Data types:** Other (please specify)

**Additional Information:** Included studies aggregate data

**How to access data:** As supplementary material in the online version of the publication

**When available:** With publication

### Supporting Documents

**Document types:** None

### Additional Information

**Who can access the data:** anyone requesting the data

**Types of analyses:** any further analyses

**Mechanisms of data availability:** As supplementary material in the online version of the publication
